1 ***Evidence of the absence of Human African Trypanosomiasis in northern Uganda: analyses of cattle, pigs***  
2 ***and tsetse flies for the presence of *Trypanosoma brucei gambiense****

3 Lucas J. Cunningham<sup>1</sup>, Jessica K. Lingley<sup>1</sup>, Iñaki Tirados<sup>1</sup>, Johan Esterhuizen<sup>1</sup>, Mercy A. Opiyo<sup>2</sup>, Clement T. N.  
4 Mangwiro<sup>3</sup>, Mike J. Lehane<sup>1</sup> and Stephen J. Torr<sup>1</sup>

5 <sup>1</sup> Department of Vector Biology, Liverpool School of Tropical Medicine, Liverpool, L3 5QA

6 <sup>2</sup> Institute for Global Health, University of Barcelona, Barcelona, 08003 Barcelona

7 <sup>3</sup>Department of Animal Science, Bindura University of Science Education, Bindura, Zimbabwe

## 8 Abstract

### 9 Background

10 Large-scale control of sleeping sickness has led to a decline in the number of cases of Gambian human  
11 African trypanosomiasis (g-HAT) to <2000/year. However, achieving complete and lasting interruption of  
12 transmission may be difficult because animals may act as reservoir hosts for *T. b. gambiense*. Our study  
13 aims to update our understanding of *T. b. gambiense* in local vectors and domestic animals of N.W.  
14 Uganda.

### 15 Methods

16 We collected blood from 2896 cattle and 400 pigs and In addition, 6664 tsetse underwent microscopical  
17 examination for the presence of trypanosomes. *Trypanosoma* species were identified in tsetse from a  
18 subsample of 2184 using PCR. Primers specific for *T. brucei* s.l. and for *T. brucei* sub-species were used to  
19 screen cattle, pig and tsetse samples.

### 20 Results

21 In total, 39/2,088 (1.9%; 95% CI=1.9-2.5) cattle, 25/400 (6.3%; 95% CI=4.1-9.1) pigs and 40/2,184 (1.8%;  
22 95% CI=1.3-2.5) tsetse, were positive for *T. brucei* s.l.. Of these samples 24 cattle (61.5%), 15 pig (60%) and  
23 25 tsetse (62.5%) samples had sufficient DNA to be screened using the *T. brucei* sub-species PCR. Further  
24 analysis found no cattle or pigs positive for *T. b. gambiense*, however, 17/40 of the tsetse samples  
25 produced a band suggestive of *T. b. gambiense*. When three of these 17 PCR products were sequenced the  
26 sequences were markedly different to *T. b. gambiense*, indicating that these flies were not infected with *T.*  
27 *b. gambiense*.

### 28 Conclusion

29 The absence of *T. b. gambiense* in cattle, pigs and tsetse accords with the low prevalence of g-HAT in the  
30 human population. We found no evidence that livestock are acting as reservoir hosts. However, this study  
31 highlights the limitations of current methods of detecting and identifying *T. b. gambiense* which relies on a  
32 single copy-gene to discriminate between the different sub-species of *T. brucei* s.l.

## 33 Author Summary

34 The decline of annual cases of West-African sleeping sickness in Uganda raises the prospect that  
35 elimination of the disease is achievable for the country. However, with the decrease in incidence and the  
36 likely subsequent change in priorities there is a need to confirm that the disease is truly eliminated. One  
37 unanswered question is the role that domestic animals play in maintaining transmission of the disease. The  
38 potential of cryptic-animal reservoirs is a serious threat to successful and sustained elimination of the  
39 disease. It is with the intent of resolving this question that we have carried out this study whereby we  
40 examined 2088 cattle, 400 pigs and 2184 tsetse for *Trypanosoma brucei gambiense*, the parasite  
41 responsible for the disease. Our study found *T. brucei* s.l. in local cattle, pigs and tsetse flies, with their  
42 respective prevalences as follows, 1.9%, 6.3% and 1.8%. Further analysis to establish identity of these  
43 positives to the sub-species level found that no cattle, pigs or tsetse were carrying the pathogen  
44 responsible for Gambian sleeping sickness. Our work highlights the difficulty of establishing the absence of  
45 a disease, especially in an extremely low endemic setting, and the limitations of some of the most  
46 commonly used methods.

## 47 Introduction

48 The term "human African trypanosomiasis" (HAT) is used to describe two diseases that are clinically, geographically  
49 and parasitological distinct. The majority of HAT cases (98%) occur in West and Central Africa and are referred to as  
50 West African sleeping sickness or Gambian HAT (g-HAT) indicating the geographical range of the disease and the  
51 protozoan parasites responsible, *Trypanosoma brucei gambiense*. Similarly, East African sleeping sickness or  
52 Rhodesian HAT (r-HAT) results from an infection caused by *T. b. rhodesiense*. While *T. b. rhodesiense* has long been  
53 known to have a primarily zoonotic lifecycle, *T. b. gambiense* is considered to be largely anthrophilic with the  
54 parasites largely circulating between tsetse and humans only. *T. b. gambiense* has been identified in domestic  
55 animals such as pigs, sheep and goats (1, 2) as well as in a number of wild animals (3, 4). Similarly, a wide range of  
56 animals have been experimentally infected with *T. b. gambiense* some of which were shown to be infective to tsetse.  
57 These observations suggest that it may be possible for animals to act as reservoirs hosts for *T. b. gambiense* (5-7)  
58 and play a role in transmission. Another study that supports the possibility of cryptic animal reservoirs are the  
59 reports of tsetse infected with *T. b. gambiense* caught in areas without cases of g-HAT (8). The unresolved question,  
60 of a zoonotic host, in the life history of *T. b. gambiense* has significant consequences if elimination by 2030 is to be  
61 achieved (9). The importance of a successful elimination campaign that does not result in low prevalence pockets of  
62 transmission is evident when one considers the history of HAT. Since the turn of the 20<sup>th</sup> century there have been  
63 three major outbreaks of sleeping sickness resulting in hundreds of thousands of deaths. Crucially the third outbreak  
64 occurred after intense control efforts had reduced the number of HAT cases to near-elimination levels (10). The  
65 threat of resurgence will always be present and require continued pressure to keep HAT in check unless it is truly  
66 eradicated.

67 Despite the well documented reports of animals infected with *T. b. gambiense*, and the evidence that tsetse can  
68 become infected through animal hosts, it is not known if zoonotic cases of *T. b. gambiense* act as cryptic reservoirs  
69 that play a role in sustaining transmission of gHAT. Modelling studies (11-13) have shown that the success or failure  
70 of eliminating sleeping sickness depends on a number of parameters, one of which is the existence of a cryptic-  
71 animal reservoir. The presence of an animal reservoir can also change the importance of the other parameters such  
72 as the importance of human migration to an area with a high tsetse biting rate in the context of heterogenous biting  
73 (12).

74 A limiting factor to analysing the role and importance of non-human hosts is the type of diagnostic method used to  
75 detect the presence of trypanosomes. Classically, microscopic detection of parasites in blood of a human is regarded  
76 as evidence of infection. However, for animal hosts this method is unable to distinguish human-infective *T. b.*  
77 *gambiense* from animal-infective *T. b. brucei* (14). Molecular methods can reliably distinguish the different  
78 trypanosome species, with a high degree of sensitivity and specificity (15). However, differentiation of the *T. brucei*  
79 sub-species, although possible, has limited sensitivity, as single copy regions of the genome must be targeted (16).  
80 Ideally samples positive for *T. brucei* s.l. will need to be assessed to verify there is enough DNA present to undergo  
81 the less sensitive sub-species PCR assay (17). To date the application of these molecular methods has not been fully  
82 applied to the N.W. of Uganda, although an animal survey was conducted from 2004-2008, this study did not  
83 validate the suitability of single copy gene amplification (18). It is likely that a portion of those samples  
84 identified as being positive for *T. brucei* s.l. lack sufficient DNA to undergo the sub-species-specific detection assay.

85 An alternative to molecular methods are serological techniques including the card agglutination test for  
86 trypanosomiasis (CATT) and the trypanolysis (TL) test, however the CATT can produce false positives due to malaria  
87 and transient trypanosome infections (19, 20). The sensitivity of the two methods also varies between geographical  
88 locations (21). The unreliability of these methods can vary across different geographical areas due to the heterogenic  
89 distribution of the markers in wild trypanosome populations, making their reliability variable (22).

## 90 Aim

91 Here we use currently available molecular assays to determine the presence or absence of *T. b. gambiense* in NW  
92 Uganda by screening the vector population and two potential, animal-reservoir populations, cattle and pigs, in a  
93 large-scale xenomonitoring campaign, using molecular methods to first identify cases of *T. brucei* s.l. and  
94 subsequently the sub-species of *T. brucei* with PCR assays.

## 97 Methods

### 98 Study site

99 The North West of Uganda has nine districts, Nebbi, Arua, Koboko, Yumbe, Moyo, Adjumani, Maracha, Amuru and  
100 Gulu, of which Arua, Koboko, Yumbe, Moyo, Maracha, Amuru and Adjumani have historic sleeping sickness foci (23).  
101 Records from 1905-1920 show deaths from HAT in the West Nile region to be 1-100 per 10,000 (24). Recent surveys  
102 from 2000-2015 show that this area of Uganda still has foci of disease, (25) recently there has been a decrease in  
103 new cases of HAT being reported and only three new cases in 2016. In 2018, 10,000 people from 28 villages across  
104 four districts (Arua, Maracha, Koboko and Yumbe) of N.W. Uganda were screened using the card agglutination test  
105 for trypanosomiasis (CATT), with any positives being followed up by CTC microscopy and trypanolysis. Out of the  
106 10,000 individuals screened none were found to have a current *T. b. gambiense* infection, although three  
107 participants did test positive for having had *T. b. gambiense* in the past (26). In this study tsetse were caught in the  
108 district of Koboko and screened for trypanosomes and in both Koboko and Arua cattle were sampled and screened  
109 for trypanosomes. No sampling for tsetse was carried out in Arua due to a vector control programme being carried  
110 out in this district (27). Pigs were sampled from Arua but not from Koboko as there are few pigs there due to it being  
111 predominantly Muslim and hence domestic pigs are scant.

#### 112 Tsetse catches

113 A total of 12,152 tsetse flies were caught along the Kochi River in the district of Koboko over a period of 16 months  
114 from April 2013 to July 2014. To catch tsetse, pyramidal traps (28) were deployed at four locations (383200N-  
115 283715E, 381611N-287545E, 383674N-280855E, 383550N-283841E). The traps were located <1m from the river and  
116 tsetse were collected twice a day, at ~07:30 h and ~15:30 h. Tsetse were transported from the trap sites to the field  
117 laboratory in cool boxes containing a damp towel to reduce heat and maintain humidity to reduce mortality of tsetse  
118 prior to dissection.

119 Of the tsetse caught, 6,664 were dissected at the field laboratory (333842N-269418E) to screen for trypanosomes in  
120 their mouthparts, salivary glands and midguts (29). Following their dissection, the three tissue types (mouthparts,  
121 salivary glands and midguts) were screened for trypanosomes at x400 using a compound-microscope with a dark-  
122 field filter. Both negative and positive tissues were then preserved, individually, in 100% ethanol, on a 96 well plate,  
123 for further molecular analysis. Of the 6,664-tsetse preserved in this manner 2,184 were processed using the  
124 molecular methods described below. The sub-sample of tsetse was selected based on the season they were caught,  
125 with samples from the wet and dry season of September 2013- February 2014 being chosen.

126

127

128 Tsetse DNA extraction

129 After transportation to the Liverpool School of Tropical Medicine, at room temperature, samples were stored at 4°C  
130 until undergoing DNA extraction, after which the samples were stored, in a separate fridge, at 4°C. Each individually-  
131 preserved tsetse tissue underwent DNA extraction, previously described in Cunningham *et al.* (30). Briefly, ethanol  
132 was evaporated by incubating the samples at 56°C for 3 hours and to the sample 135µl of extraction buffer was  
133 added (1% Proteinase K, 5% TE Chelex suspension). Finally, the samples underwent incubation at 56°C for one hour  
134 followed by incubation at 93°C for 30 minutes to halt the enzymatic activity of the proteinase K.

135 Cattle and Pig sampling

136 From August 2011 to December 2013, 2,896 cattle blood samples were collected across seven sites in N.W. Uganda,  
137 as part of an impact assessment study following the deployment of tiny targets to control the local tsetse population  
138 (27). Of the 2,896 cattle samples taken 2088 were screened for *T. brucei* s.l. using the FIND-TBR primers (27).  
139 Alongside the cattle sampling, in August 2013, 400 pigs were sampled from seven sites across in Arua (Table 1).

140

141

142

143

144

145

146

147

148

149 Table 1. Tsetse, cattle and pig sampling sites with corresponding numbers of animals sampled

| <b>Animal</b> | <b>Site</b>   | <b>Number sampled</b> | <b>Dates</b> | <b>Northing</b> | <b>Easting</b> |
|---------------|---------------|-----------------------|--------------|-----------------|----------------|
| <b>Tsetse</b> | Koboko (KO16) | 217                   | September    | 383200          | 283715         |

|                     |               |      |                |        |        |
|---------------------|---------------|------|----------------|--------|--------|
|                     | Koboko (KO19) | 443  | 2013- February | 381611 | 287545 |
|                     | Koboko (KO20) | 651  | 2014           | 383674 | 280855 |
|                     | Koboko (KO21) | 873  |                | 383550 | 283841 |
| <b>Total tsetse</b> |               | 2184 |                |        |        |
| <b>Cattle</b>       | Kubala        | 390  |                | 361283 | 284022 |
|                     | Arua          | 311  |                | 341589 | 267182 |
|                     | Ayi           | 301  | August 2011-   | 364188 | 268809 |
|                     | Inve          | 312  | December       | 351002 | 261388 |
|                     | Aiivu         | 280  | 2013           | 354092 | 281893 |
|                     | Koboko West   | 619  |                | 383176 | 277940 |
|                     | Koboko East   | 683  |                | 381647 | 283948 |
| <b>Total cattle</b> |               | 2896 |                |        |        |
| <b>Pig</b>          | Wiliffi       | 67   |                | 364383 | 288042 |
|                     | Duku          | 45   |                | 361141 | 292384 |
|                     | Tondolo       | 25   |                | 354060 | 290083 |
|                     | Ngalabia      | 68   | August 2013    | 351690 | 286723 |
|                     | Muttee        | 51   |                | 360741 | 290934 |
|                     | Drimveni      | 100  |                | 362178 | 289931 |
|                     | Inia          | 44   |                | 364383 | 288042 |
| <b>Total Pig</b>    |               | 400  |                |        |        |

150

151 Both the cattle and pigs were sampled in the following manner, the animal was restrained, and a disposable lancet  
152 was used to puncture a pineal (ear) vein. Blood was collected with three 50mm heparinised capillary tube which  
153 collected 35µl of blood. Two tubes were centrifuged at 8,000 rpm for three minutes and the buffy coat layer  
154 examined as a wet preparation at x400 magnification using a compound-microscope with a dark-field filter. The  
155 contents of the third capillary tube was transferred to a Whatman FTA card (GE Health Care, Little Chalfont) and left  
156 to air dry before it was heat sealed in a foil pouch with a packet of silica gel to ensure the sample remained  
157 desiccated.

158 To extract the DNA from the FTA card, a modified version of the method described by Ahmed was carried out as  
159 follows, 10 2mm hole-punches were taken from each bloodspot, using a Harris micro-punch. The punches were  
160 washed three times in 1ml of distilled water and then 135µl of a 1% Proteinase K/10% Chelex TE suspension was  
161 added to each batch of 10-hole punches. These were then incubated at 56°C for an hour followed by 93°C for 30  
162 minutes. In total 14 sampling sites (Fig. 1) were used to gather a total of 2896 samples from cattle and 400 from pigs  
163 across the N.W. of Uganda.

164

165



166

<insert fig 1 here>

167

Fig. 1 Map of sampling sites for tsetse, cattle and pigs from N.W. Uganda. Intervention zone denotes the area that was under tsetse control during the collection of samples described in this paper (27). The map was created by authors for this publication using Gnu Image Manipulation Software (31).

170

Primer design

171

172

173

174

175

176

177

178

179

180

181

182

183

The tsetse and livestock samples underwent different PCR assays for the detection of *T. brucei* s.l.. Tsetse were processed with a nested multiplex primer set that targeted *T. brucei* s.l., *T. congolense* and *T. vivax* whereas cattle and pig samples were screened with the FIND-TBR primers (30). The nested multiplex primers were a modified version of the generic ITS primers designed by Adams *et al.* (32). These primers were used as part of a larger study to identify tsetse positive for *T. congolense* and *T. vivax* as well as *T. brucei*. The outer nest utilised the previously published forward and reverse primers that target the internal transcribed spacer region (ITS) of the trypanosome genome (32). New primers were designed to amplify species-specific regions from the first amplicon generated. This was achieved by aligning the ITS sequence for *T. congolense* Kilifi (accession number U22317), *T. congolense* Forest (accession number U22319), *T. congolense* Savannah (accession number U22315), *T. brucei* s.l. (accession number JX910373), *T. vivax* (accession number U22316), *T. godfreyi* (accession number JN673383) and *T. simiae* (accession number AB742533). A new universal forward primer and three species-specific reverse primers were designed and used in a multiplex. The location of the new primers are shown in a diagrammatic form in relation to the universal primers designed by Adams *et al.* (Fig 2).

184

<Insert Fig 2 here>

185

Fig 2. Diagrammatic representation of the location of the multiplex ITS primers in relation to the Universal primers designed by Adams *et. al.* (2006) on the ribosomal DNA.

187

188

189

190

The resulting products vary in size based on the species of trypanosome that was amplified with the largest product belonging to *T. congolense* s.p. measuring 392bp (*T. congolense* Kilifi) to 433bp (*T. congolense* Savannah and *T. congolense* Forest). The products for *T. brucei* s.l. and *T. vivax* measure 342bp and 139bp, respectively (Fig. 3).

191

192

<Insert Fig 3 here>

193 Fig. 3 Image showing the relative sizes of the mITS PCR reaction for *T. congolense* Savannah (1), *T. vivax* (2) and *T. b.*  
 194 *brucei* (3), extraction negative control (4), reagent negative control (5) and a second *T. b. brucei* positive control (6)  
 195  
 196 *T. brucei* s.l. PCR reaction set-up

197 The PCR reactions were carried out at a final volume of 25µL each containing the following reagents: 2.5µL of 10X  
 198 PCR Buffer (Bioline, London, UK), 200µM of each of the deoxynucleotide triphosphates (dNTPs) (Thermo Fisher  
 199 Scientific, Leicestershire, UK), 1.2mM of MgCl<sub>2</sub> (Bioline, London, UK), 0.4µM of both the forward and reverse primers  
 200 and 10µL of BIOTAQ Red DNA Polymerase (Bioline). The first reaction of the two nested PCRs and standard PCR used  
 201 5µL of DNA template. For the nested PCRs second reaction 1µL of the PCR product from the first reaction was used  
 202 as the template. The primers used to detect *T. brucei* s.l. positive samples are listed in Table 2. FIND-TBR primers  
 203 were used for the cattle and pig samples and the novel multiplex ITS primers were used to screen the tsetse  
 204 samples. The different strategies to screen for *T. brucei* s.l. reflects the different objectives of the animal and tsetse  
 205 sampling with the focus on the animal samples being the identification of *T. brucei* positives while it was desirable to  
 206 confirm presence of different species of Trypanosoma to support the tsetse microscopic examination of different  
 207 tissues (midgut, mouthparts, salivary glands) from tsetse.

208 Table 2. Primers used for detection of *T. brucei* s.l.

|                    | Primer name | Target Species          | Primer Sequence 5'-3'     | Expected product size | Reference                |
|--------------------|-------------|-------------------------|---------------------------|-----------------------|--------------------------|
| <b>FIND-TBR</b>    | FIND-TBR F  | <i>Trypanozoon</i>      | TGCGCAGTTAACGCTATTATACA   | 117                   | (Cunningham et al. 2016) |
|                    | FIND-TBR R  |                         | AAAGAACAGCGTTGCAAACCTT    |                       |                          |
| <b>ITS Primers</b> | Tryp 1      | <i>Trypanosomatidae</i> | AAGCCAAGTCATCCATCG        | 220-642               | (Adams et al. 2006)      |
|                    | Tryp 2      |                         | TAGAGGAAGCAAAAG           |                       |                          |
| <b>mITS</b>        | mITSF       | <i>Trypanosomatidae</i> | TAGCTGTAGGTGAACCTGCAGC    | -                     | Unpublished              |
|                    | mITS_TcR    | <i>T. congolense</i>    | GCGTCAGGCGGCRWAAGAA       | 392, 433*             |                          |
|                    | MpMkTbR     | <i>T. brucei sl</i>     | ATGCGAGGTTGATATACACATAGCA | 342                   |                          |
|                    | MpMkTvR     | <i>T. vivax</i>         | GCCGTGCTCCACCTG           | 139                   |                          |

209 \*The size range of the *T. congolense* products varied depending on the strain type with Kilifi producing a smaller  
 210 product of 392bp in size compared to both the Savannah and Forest strains producing a product of 433bp in size.

212 However as there is a difference in the copy number being targeted by the different primers not all those samples  
213 initially identified as *T. brucei s.l.* will be identified down to a sub-species level due to insufficient DNA. Following the  
214 detection of *T. brucei s.l.* positive samples using either the multiplex ITS primers or the FIND TBR-PCR primers (30),  
215 the positive samples were screened with the Picozzi multiplex primers (17). The FIND-TBR primer targets a copy  
216 region of several thousand (33) whereas the Picozzi primers and *T. b. gambiense* species specific primers (TgsGP)  
217 (34), target a single copy region of the genome. Therefore, it will not be possible to identify a proportion (~27%) of  
218 the *T. brucei s.l.* positive samples down to the sub-species level as the species-specific primers are less sensitive than  
219 the TBR-PCR primers (35, 36) . The following methodology was used to clarify how many TgsGP negatives were  
220 negative due to either the absence of *T. b. gambiense* or insufficient genomic material.

#### 221 Identification of single copy gene and *T. brucei* sub-species

222 Having identified which samples are positive for *T. brucei s.l.* there is a need to determine what sub-species of *T.*  
223 *brucei* the sample belongs, be it *T. b. brucei*, *T. b. gambiense* or *T. b. rhodesiense* due to the significance of the  
224 presence of a human infective sub-species. The PCR assays for positive identification of *T. b. rhodesiense* and *T. b.*  
225 *gambiense* rely on the amplification of a single copy gene unique to either the West or East African parasite. If  
226 neither Gambian or Rhodesian HAT is detected, then it is assumed the organism present is *T. b. brucei*. However due  
227 to the difficulty of reliably amplifying a single copy gene, and therefore the low sensitivity of the two sub-species  
228 specific assays, there is a chance that a negative result occurs due to insufficient target DNA. To help increase the  
229 confidence of a negative result it is possible to determine if there is sufficient quantity of DNA by running an assay  
230 that amplifies a single copy gene ubiquitous to all three sub-species. The multiplex designed by Picozzi *et al* (17) is  
231 capable of assessing whether there is sufficient DNA for single copy gene amplification and to also screen for *T. b.*  
232 *rhodesiense*. The multiplex consists of universal *Trypanozoon* primers that target the *T. brucei s.l.* single copy gene,  
233 phospholipase C (PLC), as well as primers that target the serum resistance associated gene (SRA) for *T. b.*  
234 *rhodesiense*. Among the variable surface glycoprotein (VSG) genes there are regions with some sequence identity to  
235 the SRA gene. Between the VSG and SRA genes there is an internal deletion within the SRA genes that allows it to be  
236 distinguished between any VSG amplification and SRA amplification. Two pairs of primers were designed that  
237 amplify across this deleted region to allow for clear size distinction between a SRA PCR product and a VSG PCR  
238 product. The combination of primers results in the amplification of a 324 bp product for all *Trypanozoon* species, a  
239 669 bp product for *T. b. rhodesiense* and a >1 Kb for any VSG products amplified (Table 3).

240

241

242 Table 3. Primers for single copy gene detection and sub-species-specific analysis

| Primer name | Target species           | Primer sequence 5'-3'           | Multiplex product size (bp) | Reference |
|-------------|--------------------------|---------------------------------|-----------------------------|-----------|
| PLC 657     | <i>Trypanozoon</i>       | CTT TGT TGA GGA GCT GCA         | 324                         |           |
| PLC 658     |                          | CAC CGC AAA GTC GTT ATT         |                             |           |
| SRA 02      | <i>T. b. rhodesiense</i> | AGC CAA AAC CAG TGG GCA         | 669                         |           |
| SRA 03      |                          | TAG CGC TGT CCT GTA GAC GCT     |                             |           |
| VSG 651     | <i>Trypanozoon</i>       | GAA GAG CCC GTC AAG AAG GTT TG  | >1Kb                        |           |
| VSG 651     |                          | TTT TGA GCC TTC CAC AAG CTT GGG |                             |           |

  

| Primer name   | Target species         | Primer sequence 5'-3'     | Singleplex product size (bp) | Reference |
|---------------|------------------------|---------------------------|------------------------------|-----------|
| TgsGP forward | <i>T. b. gambiense</i> | GCT GCT GTG TTC GGA GAG C | 308                          |           |
| TgsGP reverse |                        | GCC ATC GTG CTT GCC GCT C |                              |           |

243

## 244 Ethics Statement

245 Ethics to sample domestic animals from Uganda was granted by the Ugandan National Council for Science and  
246 Technology ethics board, which approved the following protocol "Targeting tsetse: use of targets to eliminate African  
247 sleeping sickness" Ref. Number HS 939. The protocol followed the guidelines set out in the Ag Guide (37) and  
248 permission was granted by the animals owners for their involvement in the study.

249

## 250 Results

### 251 Microscopic examination

252 Of the 6,664 tsetse examined microscopically, 180 tsetse organs from 158 (2.4%; 95% CI=2-2.8) tsetse were  
253 positive for trypanosomes comprising 73 single midgut infections, 69 single mouthpart infections, nine  
254 mixed mouthpart-midgut infections, a single salivary gland-midgut infections and six cases where all three  
255 tissues were infected with trypanosomes. Of the 2,877 blood films examined from cattle, trypanosomes

256 were identified in 568 (19.7%; 95% CI=18.3-21.2) samples, however, it was not possible to identify down to  
 257 the species level using the microscopy methods.

258

259 Molecular Screening for *T. brucei* s.l.

260 In total 38/2,877 (1.3%; 95% CI=0.9-1.8) cattle and 25/400 (6.3%; 95% CI=4.1-9.1) pigs examined using the  
 261 FIND-TBR primers were positive for *T. brucei* s.l.. The number of tsetse positive for the three Salivarian  
 262 species of trypanosomes were as follows: *T. vivax* 46/2184 (2.1%; 95% CI=1.5-2.8), *T. brucei* s.l. 40/2184  
 263 (1.8%; 95% CI=1.3-2.5) and *T. congolense* 58/2184 (2.7%; 95% CI=2.0-3.4). Of the *T. brucei* positive tsetse,  
 264 seven had a single positive mouthpart, nine were single salivary gland positives, 20 were single midgut  
 265 positives, two were mixed salivary gland and midgut positive and the remaining two had all three tissues  
 266 positive. The presence of *T. brucei* s.l. in the mouthparts deviates from the accepted life cycle of this  
 267 trypanosome and is either due to a transient presence of trypanosomes that have passed along the  
 268 proboscis during a feed or the result of cross contamination between tissues during dissection (Table 4).

269

270 Table 4. The prevalence of PCR *T. brucei* s.l. positives across all samples and districts.

| Animal        | District | <i>T. brucei</i> s.l. positives | Numbers sampled | Percent Positive | CI        |
|---------------|----------|---------------------------------|-----------------|------------------|-----------|
| <b>Tsetse</b> | Koboko   | 40                              | 2184            | 1.8              | 1.31-2.48 |
| <b>Cattle</b> | Koboko   | 8                               | 1280            | 0.6              | 0.27-1.21 |
|               | Arua     | 30                              | 1597            | 1.9              | 1.27-2.67 |
| <b>Pigs</b>   | Arua     | 25                              | 400             | 6.3              | 4.10-9.10 |

271

272 Microscopy and Molecular comparison

273 Of the 2,184 samples screened with multiplex ITS primers, trypanosomes were observed by microscopy in  
 274 62 samples (49 flies), comprising 30 midguts, four salivary glands and 28 mouthparts. Of the microscopy  
 275 positives the molecular assay identified 48 of 62 positive tissues, (Table 5).

276 Table 5. Species identification by multiplex ITS primers of microscopy positive tsetse tissues

|           |                            | Midgut | Salivary glands | Mouth parts |
|-----------|----------------------------|--------|-----------------|-------------|
|           | <b>Microscopy positive</b> | 30     | 4               | 28          |
| <b>Mu</b> | <i>T. brucei</i> s.l.      | 4      | 2               | 0           |

|                        |                                     |    |   |    |
|------------------------|-------------------------------------|----|---|----|
| Itiplex ITS<br>results | <i>T. congolense</i>                | 10 | 1 | 7  |
|                        | <i>T. vivax</i>                     | 0  | 0 | 15 |
|                        | <i>T. brucei s.l. +T. vivax</i>     | 0  | 0 | 1  |
|                        | <i>T. brucei s.l.+T. congolense</i> | 6  | 1 | 1  |
|                        | PCR Neg                             | 10 | 0 | 4  |

277

278

279 *T. brucei* s.l. sub-species screening

280 The 103 *T. brucei* s.l. positive cattle, pig and tsetse samples were processed using the *T. brucei* s.l. multiplex

281 assay to screen for *T. b. gambiense*, *T. b. rhodesiense* and the number of samples with enough DNA to

282 detect down to a single-copy gene. While not expecting to identify any cases of *T. b. rhodesiense* the

283 inclusion of a positive control for the East African form of the disease acts as another quality control (Fig 4).

284 None of the samples tested positive for the SRA gene, confirming our expectation that *T. b. rhodesiense*

285 was not present. However of the cattle, pigs and tsetse, 24 (63%), 15 (60%) and 25 (56%) were positive for

286 the PLC gene, respectively, suggesting that sufficient DNA was present to detect DNA from *T. b.*

287 *rhodesiense* or *T. b. gambiense* if it were present.

288

289

<Insert Fig 4 here>

290 Fig 4. Example of gel run showing the results of the sub-species *Trypanozoon* multiplex PCR. The 324bp PLC

291 product can be seen in the three positive controls and in sample number 2. The 669bp SRA product can be

292 seen in the *T. b. rhodesiense* positive control but is absent from the other *T. brucei* sub-species. A >1 kb

293 VSG product is visible in sample 2 and is faintly visible in the *T. b. rhodesiense* positive control. A fourth

294 product of ~700 bp can also be seen in the *T. b. gambiense* and *T. b. rhodesiense* positive controls as well

295 as sample 2.

296 The samples that proved to have enough genetic material for the amplification of the single copy PLC gene

297 were then screened using the sub-species-specific *T. b. gambiense* primer, TgsGP. Among the cattle and pig

298 samples there was no amplification of a 308 bp product however 17 tsetse samples produced a band

299 approximately 308 bp in size.

300 Of the 17 bands, a subsample of three were sent for sequencing to determine the specific product size and  
301 sequence. The samples were sent to SourceBioscience using both forward and reverse primers. The results  
302 of the sequencing showed that the three bands sent were identical and that the product was 281 bp  
303 (inclusive of primers) in length. The sequence when aligned against reference sequences for *T. b.*  
304 *gambiense* using the NCBI database resulted in only a 90% identity and a query cover of 16% Fig 5.

305 <Insert Fig 5 here>

306 Fig 5. Results of the sequence alignment of the three samples sent for sequencing (3923, 3861 and 4280)  
307 against the *T. b. gambiense* positive control (Pos\_ctrl) and reference sequence (FN555990) from the NCBI  
308 database. Image generated using MultAlin (38).

309

310 Discussion

311 The aim of this paper was to determine the prevalence of *T. b. gambiense* in local tsetse, cattle and pig populations  
312 from N.W. Uganda. The successful identification of *T. b. gambiense* would suggest that transmission of sleeping  
313 sickness in the area was continuing and the identification of the disease in either cattle or pigs would help resolve  
314 the role of animal reservoirs in the transmission of the disease.

315

316 Tsetse

317 Of the 40 tsetse samples identified as *T. brucei* s.l. positive by PCR 56% were found to have enough DNA for the  
318 amplification of a single-copy gene region. Sixteen produced faint bands of approximately 300bp, comparable in size  
319 to the expected band size for *T. b. gambiense*. However sequencing results showed that the size of the product  
320 generated by the samples was smaller than the expected size at only 281bp compared to the expected 308bp sized  
321 product. There was also significant variation in the 281bp sized sequences compared to *T. b. gambiense* sequence.  
322 Based on the sequencing results these positive samples cannot be unequivocally identified as *T. b. gambiense*.

323 Three conclusions arise from the tsetse survey, the first is that despite screening 2,184 tsetse, no tsetse were found  
324 to be positive for *T. brucei gambiense*, this could be due to *T. b. gambiense* no longer being transmitted in the area

325 or that our sample size was too small to detect *T. b. gambiense*. Despite being understood as the sole vector of gHAT  
326 (39) the prevalence of the disease amongst wild tsetse population is often extremely low (1, 40, 41) and attempts to  
327 infect tsetse with *T. b. gambiense* under laboratory conditions have often proven unsuccessful (42). Studies have  
328 suggested that the prevalence of *T. b. gambiense* may be as low as 1 in 4,000 flies (11). However, this number is  
329 based on microscopy methods, whereas PCR methods should be more sensitive and could identify immature and  
330 transient infections reducing the number of tsetse needed to be screened (8). Second despite no *T. b. gambiense*  
331 being found, the tsetse population studied were actively transmitting *T. b. brucei*. Third, the TgsGP primers cross-  
332 reacted with DNA from an unidentified source and produced a band, similar in size, to *T. b. gambiense*, this raises  
333 concerns about the specificity of the TgsGP primers are and the potential for erroneously reporting the presence of  
334 *T. b. gambiense*.

335  
336 Table 4 shows that the positive midguts were identified as either *T. brucei* or *T. congolense* similarly of the positive  
337 mouthparts all were infected with either *T. congolense* or *T. vivax* with no mono infections of *T. brucei* s.l. identified,  
338 although in cases of mixed infections *T. brucei* s.l. was detected in the mouthparts.

339 The infected salivary glands were predominantly positive for *T. brucei* s.l. however there was one instance of a single  
340 *T. congolense* infection. The presence of a mITS positive does not indicate an infection of a specific tissue by the  
341 trypanosome detected but merely the DNA, which could be a transient trypanosome, free floating DNA or DNA  
342 introduced during the dissection step; previous studies have found similar results (43). Although, overall, the  
343 comparison between the mITS results and those of the dissection correlate closely with the traditional methods used  
344 to identify trypanosome species based on their location in different tsetse tissues (29), however these methods  
345 cannot distinguish between species easily and certainly not between sub-species.

#### 346 347 Cattle and pigs

348 No animal samples (pig or cattle) produced a band of either 308bp or 281bp when screened with the TgsGP primers,  
349 indicating that there were no zoonotic *T. b. gambiense* infections nor where there any cases similar to those found in  
350 the fly samples, where non-target DNA was amplified. However, cases of *T. b. brucei* were found in both animal  
351 populations with pigs proving to have the higher prevalence of *T. b. brucei* infection. This is typical of trypanosome



352 epidemiology which has been shown to be highly localised in other studies (44). The lack of any positive *T. b.*  
353 *gambiense* in the two animal populations sampled correlates with a previous study carried out in the same area (18),  
354 indicating that it is unlikely either cattle or pigs are acting as cryptic reservoirs of disease.

355

### 356 Diagnostics for *T. b. gambiense*

357 The diagnostic methods used in this paper involved both microscopy and PCR, of which only PCR has the potential to  
358 discriminate sub-species of *T. b. gambiense* (17, 34). There are few diagnostic methods that are capable of  
359 accurately distinguishing between the *T. brucei* sub-species (16, 17, 34). The molecular methods available for the  
360 detection of *T. b. gambiense* are limited due to the practical aspect of conducting these assays in the field and the  
361 limited diagnostic markers available. As mentioned previously the sensitivity of *T. b. gambiense* specific PCR is  
362 limited to detecting a single copy gene. Some molecular assays attempt to overcome this problem by relying on the  
363 human serums ability to lyse all salivarian trypanosomes (except for *T. b. gambiense* and *T. b. rhodesiense*) therefore  
364 any *T. brucei* s.l. identified in a human sample would be one of the two HAT species (45). This allows for the targeting  
365 of a higher copy region specific to the *T. brucei* species group. Using this method any positives would have to be one  
366 of the two HAT species, however as the treatment of the two diseases differs and the only option to try and identify  
367 if it was an East or West African sleeping sickness infection would be to try and determine the geographical location  
368 of where the individual was infected. This approach would also only be limited to humans and could not be used in  
369 either xenodiagnoses or screening animals, as all three *T. brucei* sub-species could be present in the vector or animal  
370 populations. To put these differences of sensitivity in perspective, we can look at the limit of detection (LoD) of the  
371 number of trypanosome per mL, between multiple diagnostic methods (Table 6.).

372 Table 6. Comparison of LoD between different diagnostic techniques

| Type       | Method  | LoD (tryps per mL) | Ref         |
|------------|---------|--------------------|-------------|
| Microscopy | CTC*    | 500                | (46)        |
|            | mAECT** | 30                 |             |
| Molecular  | TBR     | 10                 | (30)        |
|            | LAMP    | <1                 |             |
|            | TgsGP   | ~100000            | Unpublished |

373 \*Capillary tube centrifugation, \*\*mini Anion Exchange Centrifugation Technique

374 The lack of a highly specific, sensitive and field-friendly assay that is capable of screening for *T. b. gambiense* in both  
375 the human, vector and local animal populations is sorely needed if the hope of eliminating sleeping sickness by 2020  
376 is to be achieved.

377

378

379 Conclusion

380 This lack of positive samples reflects the overall low prevalence of the disease and the continued decrease in the  
381 number of cases in Uganda (47). This study also highlights the lack of highly sensitive diagnostics that can  
382 discriminate between the different sub-species of *T. brucei* s.l.. Despite not finding *T. b. gambiense* in the tsetse  
383 population of Koboko vector control has been calculated to being essential to reach the elimination goal of 2030 (48)

384 Acknowledgments

385 The authors of this paper would like to thank the staff based in Uganda and LSTM that assisted in the fieldwork,  
386 notably Victor Drapari, Edward Aziku, Henry Ombanya.

387

388 References

389

- 390 1. Jamonneau V, Ravel S, Koffi M, Kaba D, Zeze DG, Ndri L, et al. Mixed infections of trypanosomes in tsetse and  
391 pigs and their epidemiological significance in a sleeping sickness focus of Cote d'Ivoire. *Parasitology*. 2004;129:693-  
392 702.
- 393 2. Njiokou F, Nimpaye H, Simo G, Njitichouang GR, Asonganyi T, Cuny G, et al. DOMESTIC ANIMALS AS  
394 POTENTIAL RESERVOIR HOSTS OF TRYPANOSOMA BRUCEI GAMBIENSE IN SLEEPING SICKNESS FOCI IN CAMEROON.  
395 *Parasite-Journal De La Societe Francaise De Parasitologie*. 2010;17(1):61-6.
- 396 3. Njiokou F, Laveissere C, Simo G, Nkinin S, Grebaut P, Cuny G, et al. Wild fauna as a probable animal reservoir  
397 for *Trypanosoma brucei gambiense* in Cameroon. *Infection Genetics and Evolution*. 2006;6(2):147-53.
- 398 4. Cordon-Obras C, Rodriguez YF, Fernandez-Martinez A, Cano J, Ndong-Mabale N, Ncogo-Ada P, et al.  
399 Molecular evidence of a *Trypanosoma brucei gambiense* sylvatic cycle in the human african trypanosomiasis foci of  
400 Equatorial Guinea. *Frontiers in Microbiology*. 2015;6.
- 401 5. Duke HL. Antelope and their relation to Trypanosomiasis. *Proceedings of the Royal Society of London Series*  
402 *B-Containing Papers of a Biological Character*. 1912;85(577):156-69.
- 403 6. Moloo SK, Asonganyi T, Jenni L. CYCLICAL DEVELOPMENT OF TRYPANOSOMA-BRUCEI-GAMBIENSE FROM  
404 CATTLE AND GOATS IN GLOSSINA. *Acta Tropica*. 1986;43(4):407-8.
- 405 7. Thomas HW. A comparison of the animal reactions of the trypanosomes of Uganda and Congo Free State -  
406 Sleeping sickness with those of *Trypanosoma gambiense* (dutton) - A preliminary report. *Lancet*. 1904;1:1337-40.
- 407 8. Cordon-Obras C, Garcia-Estebanez C, Ndong-Mabale N, Abaga S, Ndong-Asumu P, Benito A, et al. Screening  
408 of *Trypanosoma brucei gambiense* in Domestic Livestock and Tsetse Flies from an Insular Endemic Focus (Luba,  
409 Equatorial Guinea). *Plos Neglected Tropical Diseases*. 2010;4(6).
- 410 9. Buscher P, Bart JM, Boelaert M, Bucheton B, Cecchi G, Chitnis N, et al. Do Cryptic Reservoirs Threaten  
411 Gambiense-Sleeping Sickness Elimination? *Trends in Parasitology*. 2018;34(3):197-207.

- 412 10. Hasker E, Lutumba P, Chappuis F, Kande V, Potet J, De Weggheleire A, et al. Human African Trypanosomiasis  
413 in the Democratic Republic of the Congo: A Looming Emergency? Plos Neglected Tropical Diseases. 2012;6(12).
- 414 11. Rock KS, Stone CM, Hastings IM, Keeling MJ, Torr SJ, Chitnis N. Mathematical Models of Human African  
415 Trypanosomiasis Epidemiology. Mathematical Models for Neglected Tropical Diseases: Essential Tools for Control  
416 and Elimination, Pt A. 2015;87:53-133.
- 417 12. Stone CM, Chitnis N. Implications of Heterogeneous Biting Exposure and Animal Hosts on Trypanosomiasis  
418 *brucei gambiense* Transmission and Control. Plos Computational Biology. 2015;11(10).
- 419 13. Funk S, Nishiura H, Heesterbeek H, Edmunds WJ, Checchi F. Identifying Transmission Cycles at the Human-  
420 Animal Interface: The Role of Animal Reservoirs in Maintaining Gambiense Human African Trypanosomiasis. Plos  
421 Computational Biology. 2013;9(1).
- 422 14. Lehane MJ, Msangi AR, Whitaker CJ, Lehane SM. Grouping of trypanosome species in mixed infections in  
423 *Glossina pallidipes*. Parasitology. 2000;120:583-92.
- 424 15. Malele I, Craske L, Knight C, Ferris V, Njiru Z, Hamilton P, et al. The use of specific and generic primers to  
425 identify trypanosome infections of wild tsetse flies in Tanzania by PCR. Infection Genetics and Evolution.  
426 2003;3(4):271-9.
- 427 16. Berberof M, Perez-Morga D, Pays E. A receptor-like flagellar pocket glycoprotein specific to *Trypanosoma*  
428 *brucei gambiense*. Molecular and Biochemical Parasitology. 2001;113(1):127-38.
- 429 17. Picozzi K, Carrington M, Welburn SC. A multiplex PCR that discriminates between *Trypanosoma brucei brucei*  
430 and zoonotic T-b. *rhodesiense*. Experimental Parasitology. 2008;118(1):41-6.
- 431 18. Balyeidhusa ASP, Kironde FAS, Enyaru JCK. Apparent lack of a domestic animal reservoir in Gambiense  
432 sleeping sickness in northwest Uganda. Veterinary Parasitology. 2012;187(1-2):157-67.
- 433 19. Chappuis F, Loutan L, Simarro P, Lejon V, Buscher P. Options for field diagnosis of human African  
434 trypanosomiasis. Clinical Microbiology Reviews. 2005;18(1):133-+.
- 435 20. Gillet P, Ngoyi DM, Lukuka A, Kande V, Atua B, van Griensven J, et al. False Positivity of Non-Targeted  
436 Infections in Malaria Rapid Diagnostic Tests: The Case of Human African Trypanosomiasis. Plos Neglected Tropical  
437 Diseases. 2013;7(4).
- 438 21. Van Xong H, Vanhamme L, Chamekh M, Chimfwembe CE, Van Den Abbeele J, Pays A, et al. A VSG expression  
439 site-associated gene confers resistance to human serum in *Trypanosoma rhodesiense*. Cell. 1998;95(6):839-46.
- 440 22. Truc P, Lejon V, Magnus E, Jamonneau V, Nangouma A, Verloo B, et al. Evaluation of the micro-CATT,  
441 CATT/*Trypanosoma brucei gambiense*, and LATE X/T-b. *gambiense* methods for serodiagnosis and surveillance of  
442 human African trypanosomiasis in West and Central Africa. Bulletin of the World Health Organization.  
443 2002;80(11):882-6.
- 444 23. WHO. The Atlas of human African trypanosomiasis (2000-2009): North Western Uganda [Available from:  
445 [http://www.who.int/trypanosomiasis\\_african/country/Uganda\\_NorthWestern.pdf?ua=1](http://www.who.int/trypanosomiasis_african/country/Uganda_NorthWestern.pdf?ua=1)].
- 446 24. Berrang-Ford L, Odiit M, Maiso F, Waltner-Toews D, McDermott J. Sleeping sickness in Uganda: revisiting  
447 current and historical distributions. African Health Sciences. 2006;6(4):223-31.
- 448 25. Simarro PP, Cecchi G, Paone M, Franco JR, Diarra A, Ruiz JA, et al. The Atlas of human African  
449 trypanosomiasis: a contribution to global mapping of neglected tropical diseases. International Journal of Health  
450 Geographics. 2010;9.
- 451 26. Selby R, Wamboga C, Erphas O, Mugenyi A, Jamonneau V, Waiswa C, et al. Gambian Human African  
452 Trypanosomiasis in North West Uganda. Are we on course for the 2020 target? Plos NTD. 2019.
- 453 27. Tirados I, Esterhuizen J, Kovacic V, Mangwiro TNC, Vale GA, Hastings I, et al. Tsetse Control and Gambian  
454 Sleeping Sickness; Implications for Control Strategy. Plos Neglected Tropical Diseases. 2015;9(8).
- 455 28. Lancien J, Gouteux JP. Le piege pyramidal a mouche tsetse (Diptera: *Glossinidae*). Afrique Medicale.  
456 1987;26:647-52.
- 457 29. Lloyd L. The trypanosome infections of tsetse flies in northern Nigeria and a new method of estimation.  
458 Bulletin of Entomological Research. 1924;14:265-88.
- 459 30. Cunningham LJ, Lingley JK, Haines LR, Ndung'u JM, Torr SJ, Adams ER. Illuminating the Prevalence of  
460 *Trypanosoma brucei* s.l. in *Glossina* Using LAMP as a Tool for Xenomonitoring. Plos Neglected Tropical Diseases.  
461 2016;10(2).
- 462 31. GIMP: GNU Image Manipulation Program [Available from: <https://www.gimp.org/>].
- 463 32. Adams ER, Malele II, Msangi AR, Gibson WC. Trypanosome identification in wild tsetse populations in  
464 Tanzania using generic primers to amplify the ribosomal RNA ITS-1 region. Acta Tropica. 2006;100(1-2):103-9.
- 465 33. Moser DR, Cook GA, Ochs DE, Bailey CP, McKane MR, Donelson JE. DETECTION OF TRYPANOSOMA-  
466 CONGOLENSE AND TRYPANOSOMA-BRUCI SUBSPECIES BY DNA AMPLIFICATION USING THE POLYMERASE CHAIN-  
467 REACTION. Parasitology. 1989;99:57-66.

- 468 34. Radwanska M, Claes F, Magez S, Magnus E, Perez-Morga D, Pays E, et al. Novel primer sequences for  
469 polymerase chain reaction-based detection of *Trypanosoma brucei gambiense*. *American Journal of Tropical*  
470 *Medicine and Hygiene*. 2002;67(3):289-95.
- 471 35. Anderson NE, Mubanga J, Fevre EM, Picozzi K, Eisler MC, Thomas R, et al. Characterisation of the Wildlife  
472 Reservoir Community for Human and Animal Trypanosomiasis in the Luangwa Valley, Zambia. *Plos Neglected*  
473 *Tropical Diseases*. 2011;5(6).
- 474 36. Ahmed HA, Picozzi K, Welburn SC, MacLeod ET. A comparative evaluation of PCR- based methods for  
475 species- specific determination of African animal trypanosomes in Ugandan cattle. *Parasites & Vectors*. 2013;6.
- 476 37. FASS. Guide for the Care and Use of Agricultural Animals in Research and Teaching. 3rd ed2010.
- 477 38. INRA. MultAlin 1988 [Available from: <http://multalin.toulouse.inra.fr/multalin/multalin.html>].
- 478 39. Leak S. Tsetse Biology and Ecology: Their Role in the Epidemiology Control of Trypanosomiasis. Wallingford,  
479 UK: CABI Publishing; 1999.
- 480 40. Farikou O, Njiokou F, Simo G, Asonganyi T, Cuny G, Geiger A. Tsetse fly blood meal modification and  
481 trypanosome identification in two sleeping sickness foci in the forest of southern Cameroon. *Acta Tropica*.  
482 2010;116(1):81-8.
- 483 41. Kagbadouno MS, Camara M, Rouamba J, Rayaisse JB, Traore IS, Camara O, et al. Epidemiology of Sleeping  
484 Sickness in Boffa (Guinea): Where Are the Trypanosomes? *Plos Neglected Tropical Diseases*. 2012;6(12).
- 485 42. Maudlin I, Dukes P, Luckins AG, Hudson KM. EXTRACHROMOSOMAL-INHERITANCE OF SUSCEPTIBILITY TO  
486 TRYPANOSOME INFECTION IN TSETSE-FLIES .2. SUSCEPTIBILITY OF SELECTED LINES OF GLOSSINA MORSITANS-  
487 MORSITANS TO DIFFERENT STOCKS AND SPECIES OF TRYPANOSOME. *Annals of Tropical Medicine and Parasitology*.  
488 1986;80(1):97-105.
- 489 43. Morlais I, Grebaut P, Bodo JM, Djoha S, Cuny G, Herder S. Detection and identification of trypanosomes by  
490 polymerase chain reaction in wild tsetse flies in Cameroon. *Acta Tropica*. 1998;70(1):109-17.
- 491 44. Hamill LC, Kaare MT, Welburn SC, Picozzi K. Domestic pigs as potential reservoirs of human and animal  
492 trypanosomiasis in Northern Tanzania. *Parasites & Vectors*. 2013;6.
- 493 45. Mitashi P, Hasker E, Ngoyi DM, Pyana PP, Lejon V, Van der Veken W, et al. Diagnostic Accuracy of Loopamp  
494 *Trypanosoma brucei* Detection Kit for Diagnosis of Human African Trypanosomiasis in Clinical Samples. *Plos*  
495 *Neglected Tropical Diseases*. 2013;7(10).
- 496 46. Wastling SL, Welburn SC. Diagnosis of human sleeping sickness: sense and sensitivity. *Trends in Parasitology*.  
497 2011;27(9):394-402.
- 498 47. WHO. Uganda Trend [Available from:  
499 [http://www.who.int/trypanosomiasis\\_african/country/uganda\\_trend.jpg?ua=1](http://www.who.int/trypanosomiasis_african/country/uganda_trend.jpg?ua=1)].
- 500 48. Sutherland CS, Stone CM, Tediosi F. Seeing beyond 2020: cost-effectiveness analysis of contemporary and  
501 emerging strategies for human African trypanosomiasis (HAT) *Trypanosoma brucei* (T.b.) *gambiense* for elimination.  
502 *Tropical Medicine & International Health*. 2015;20:103-4.

503

504

505

506

507

508

509

510

511

512



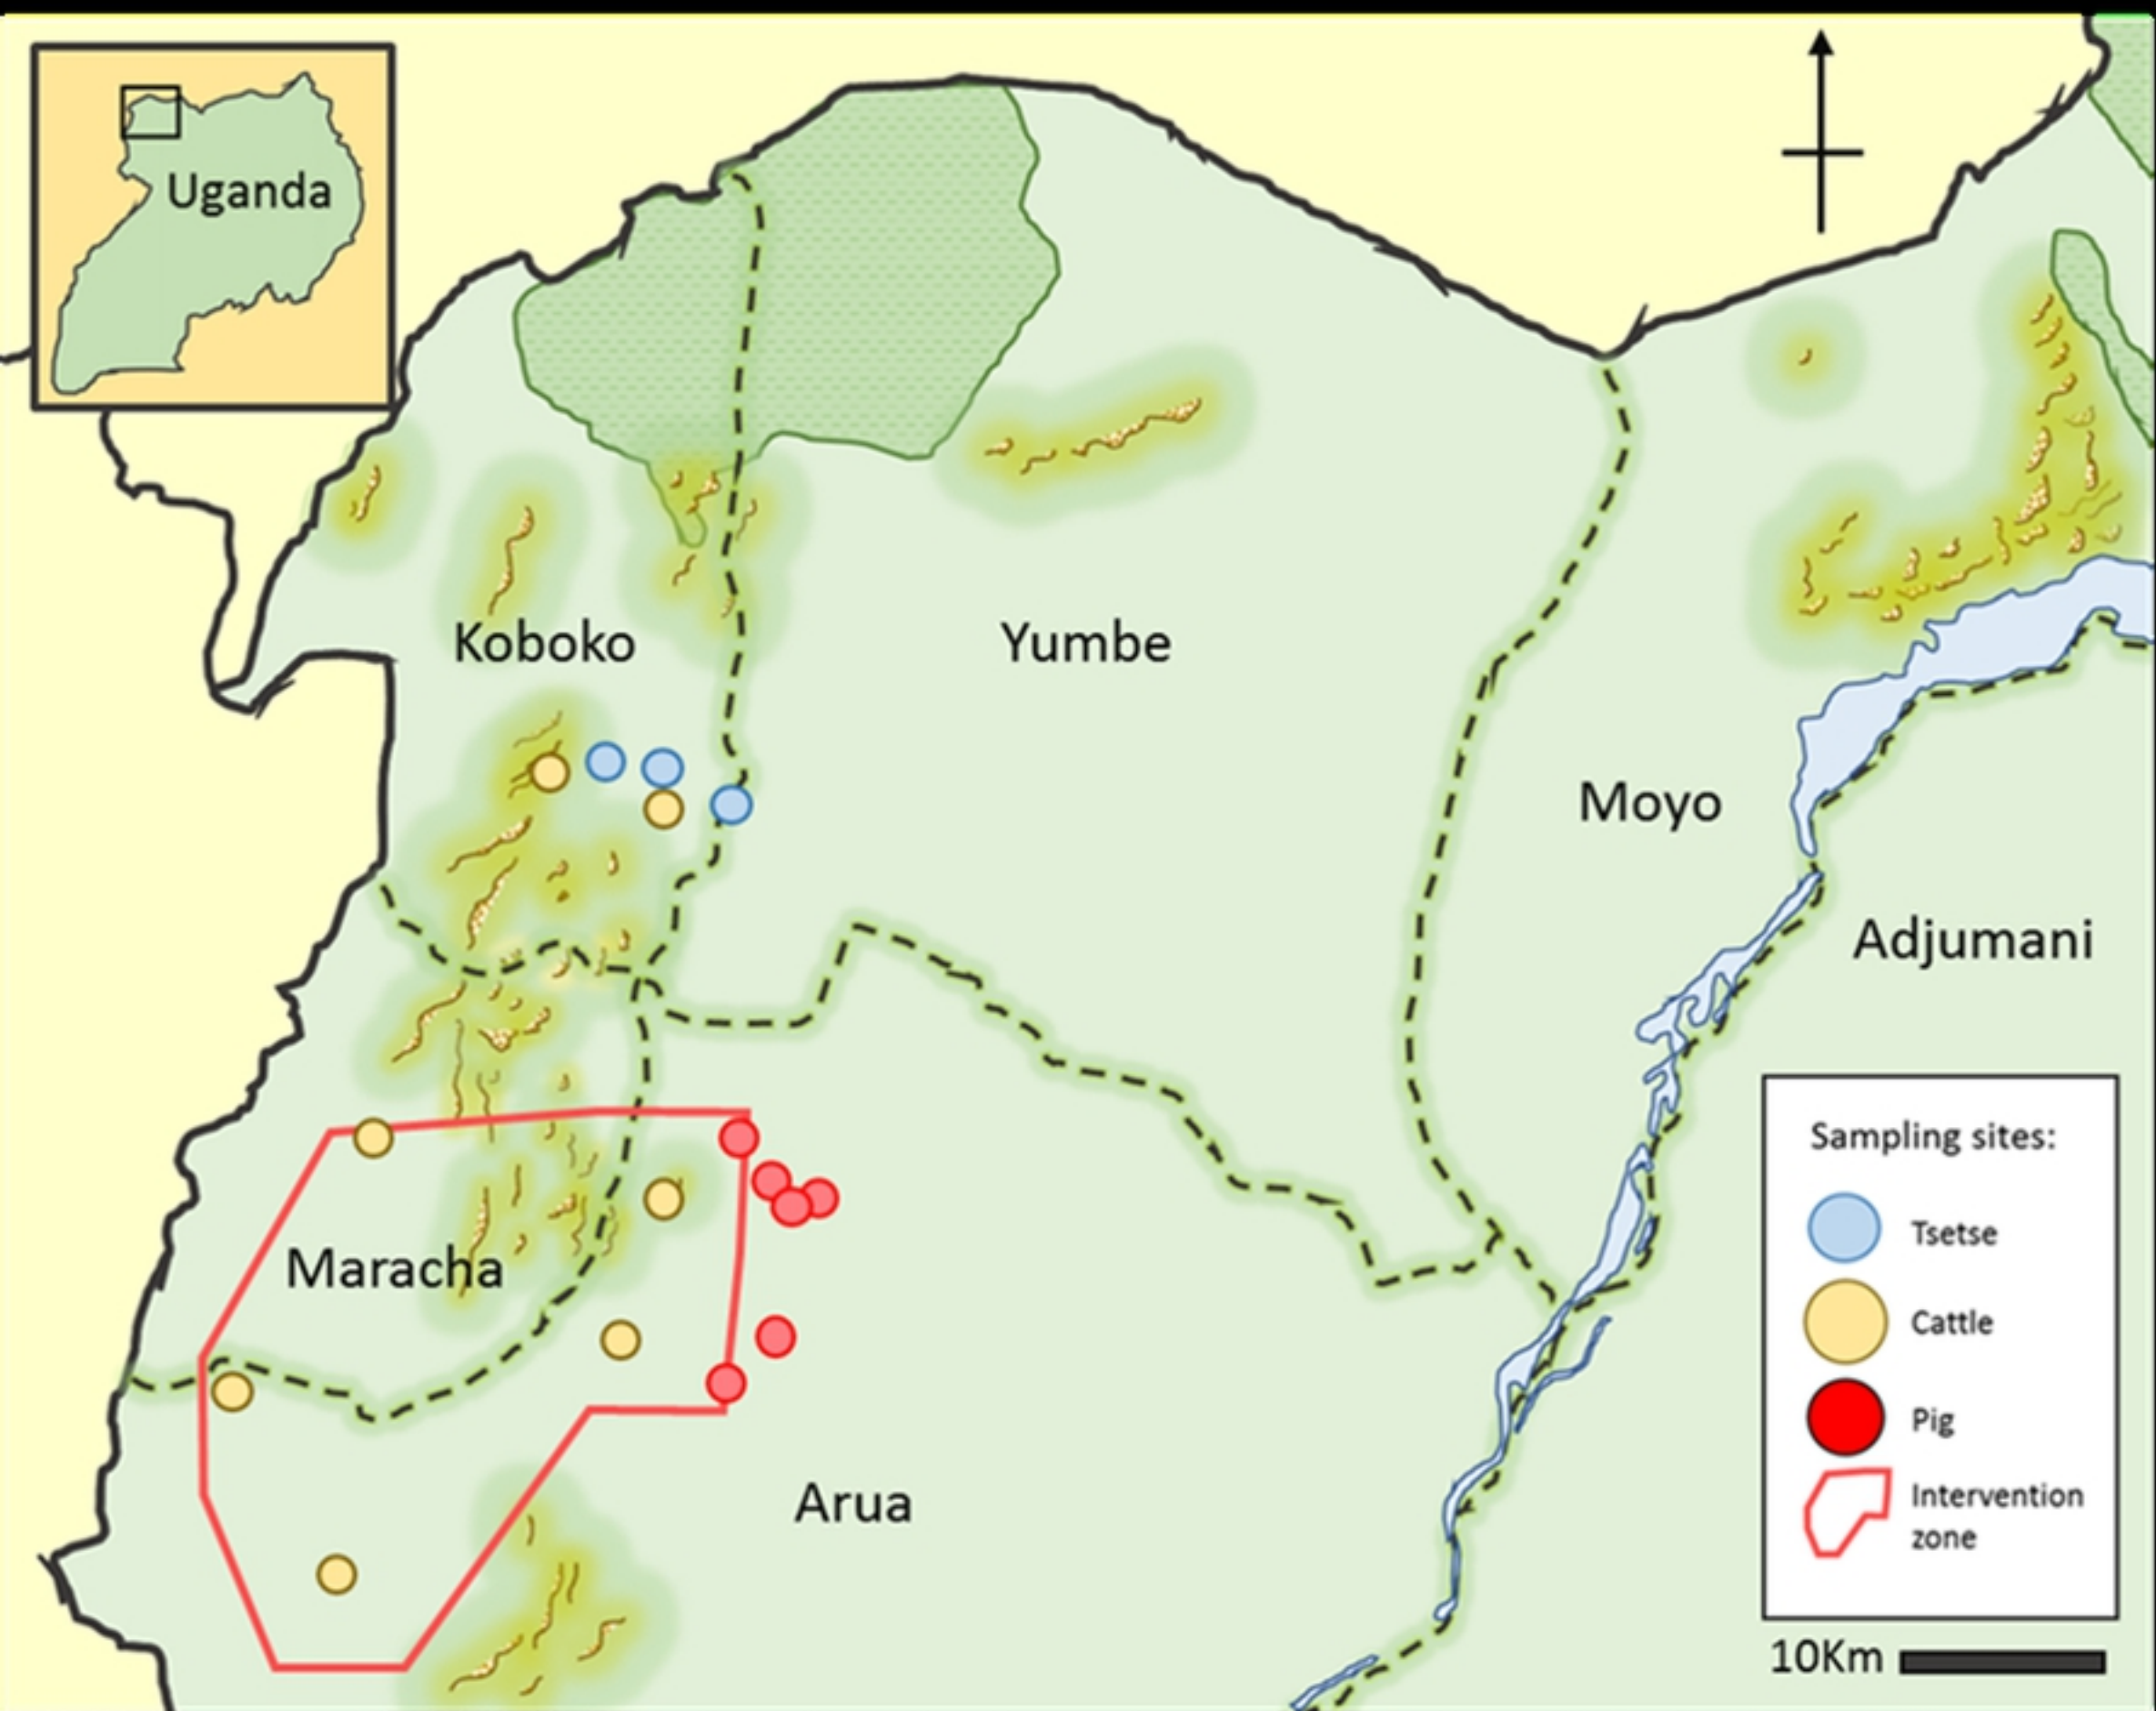

Figure

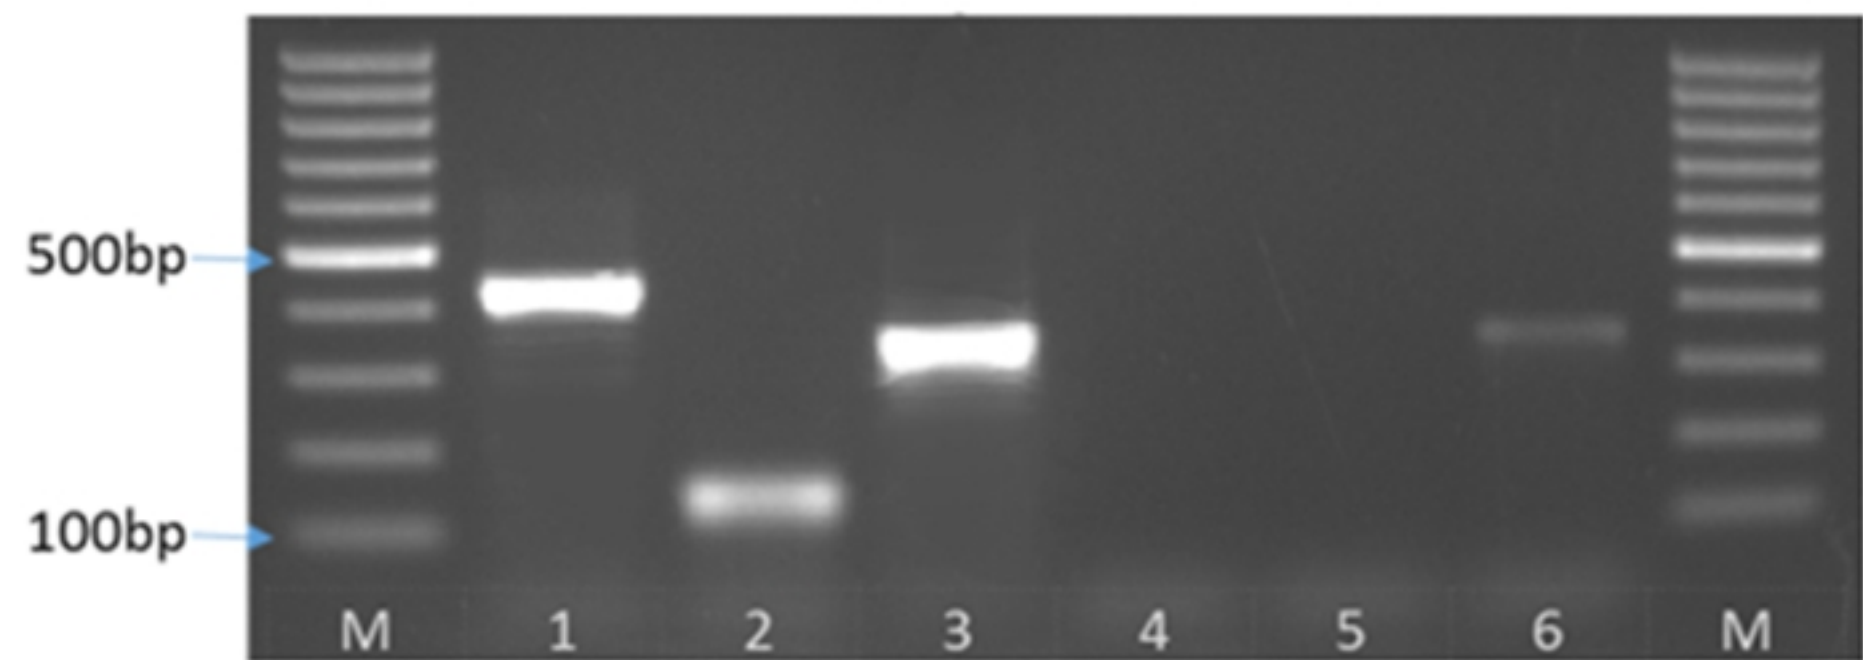

Figure



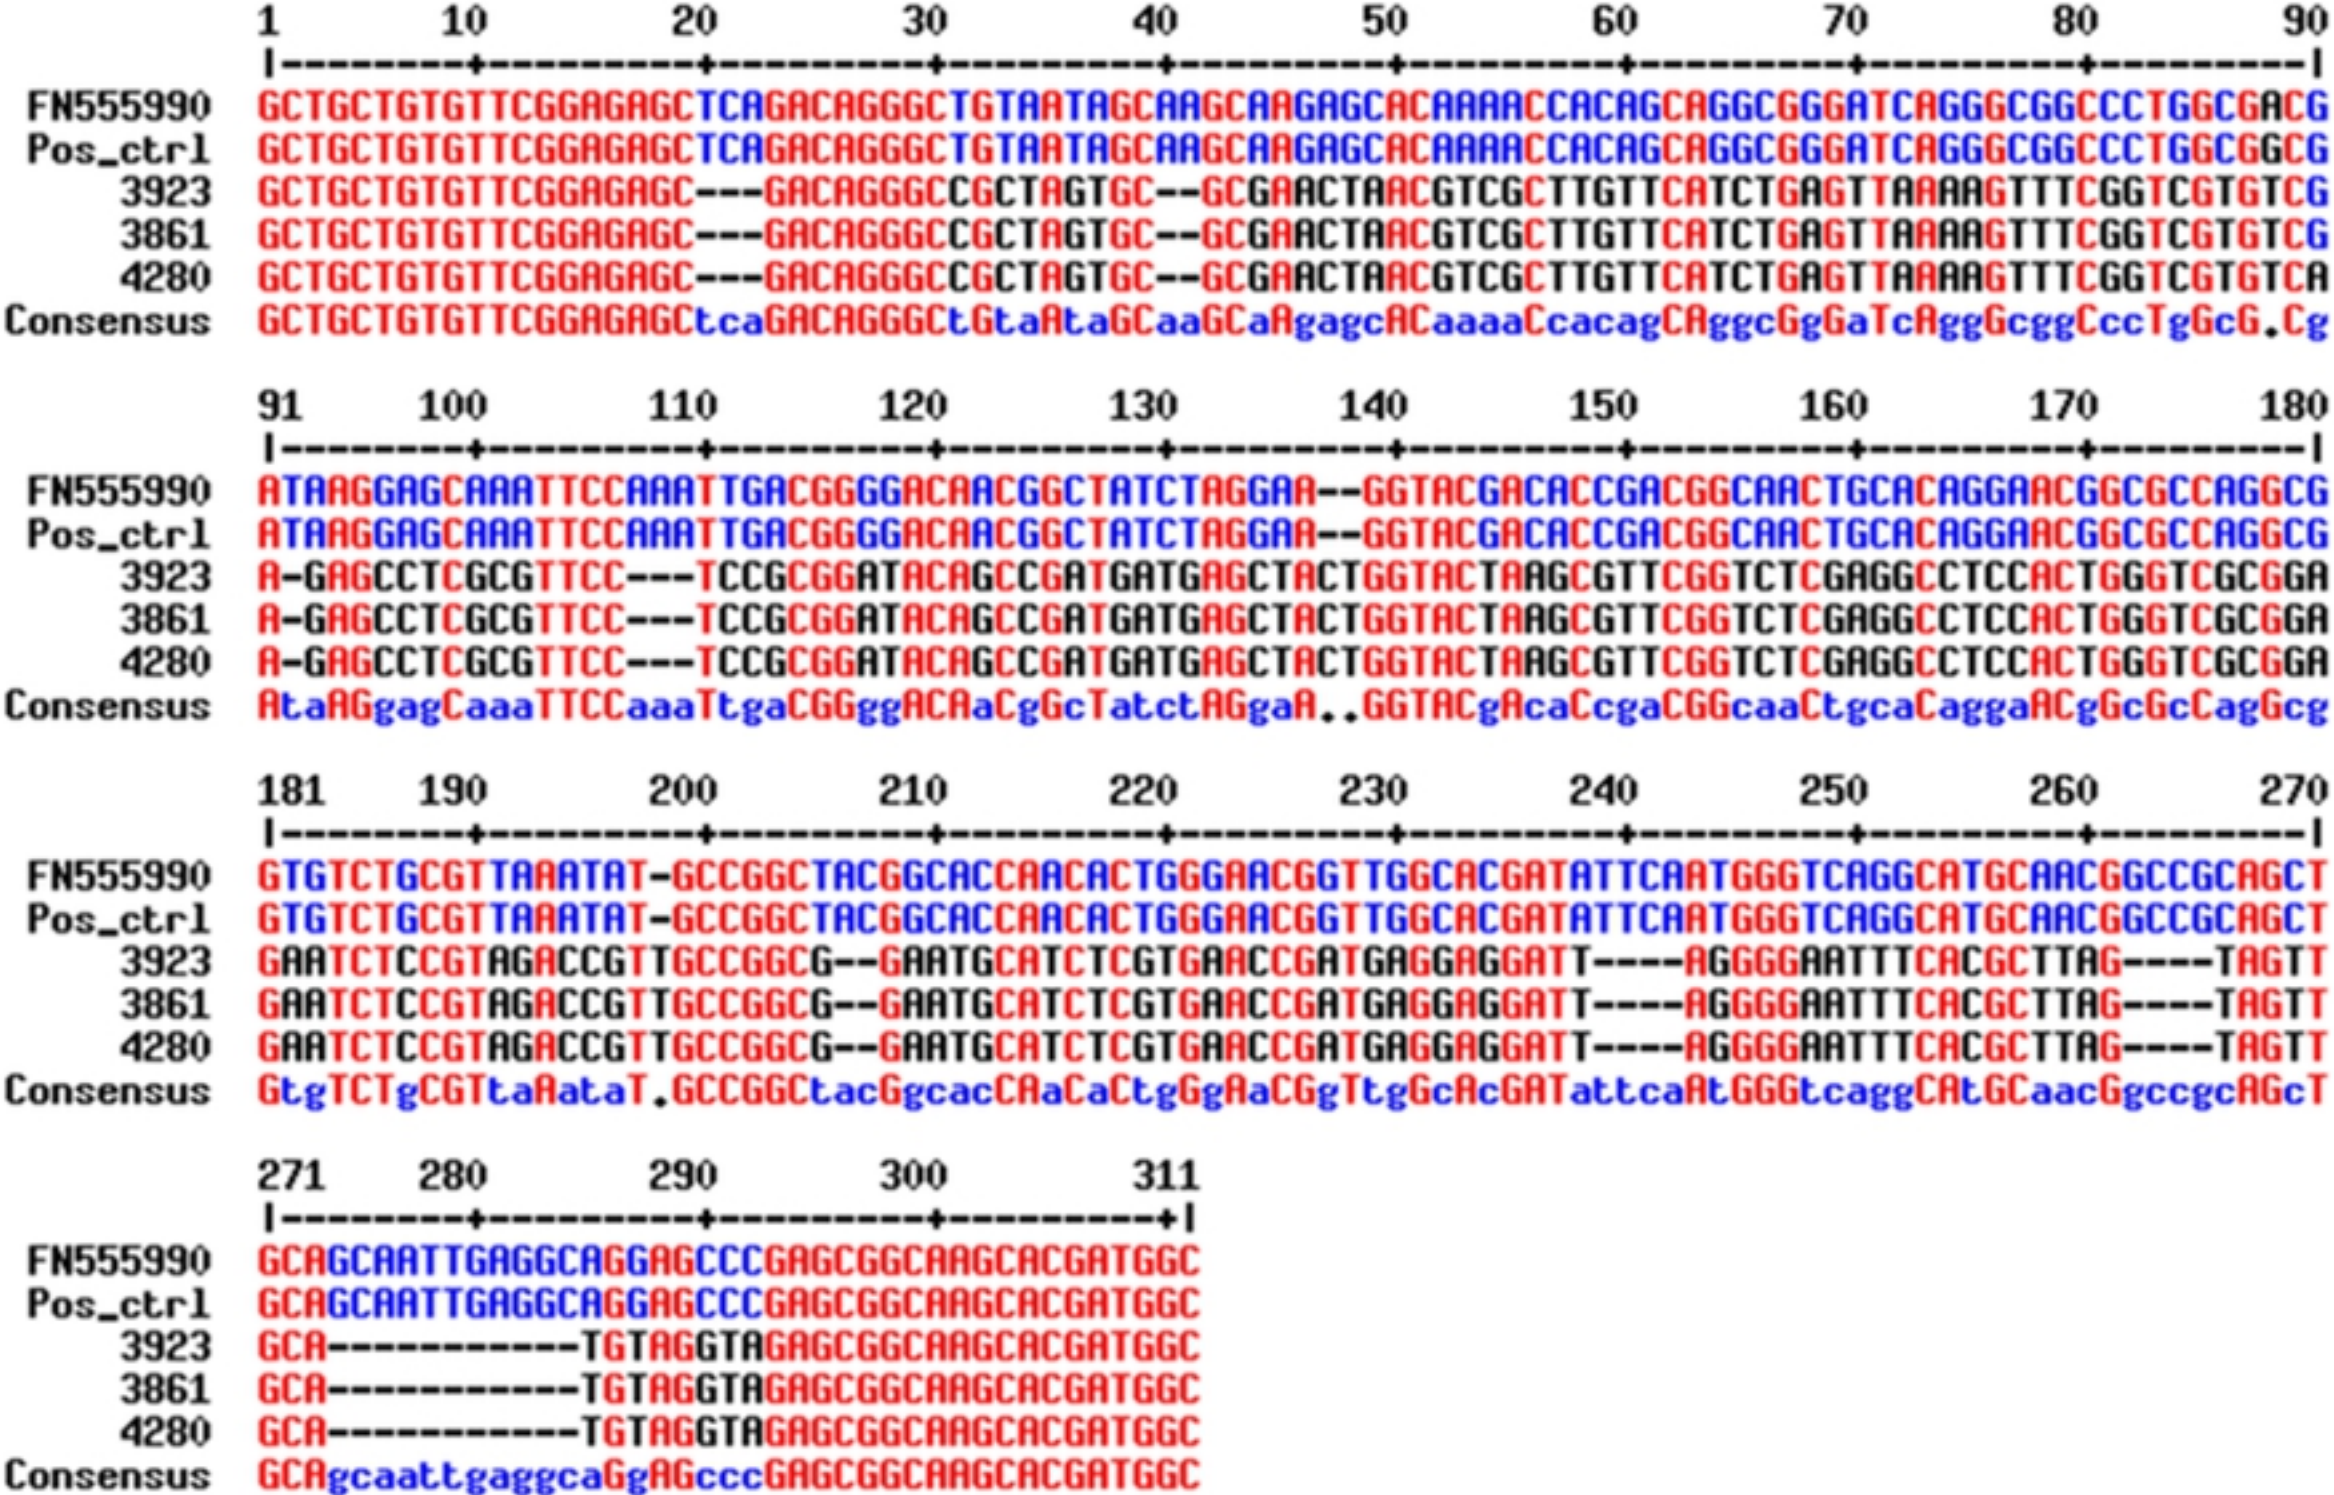

Figure

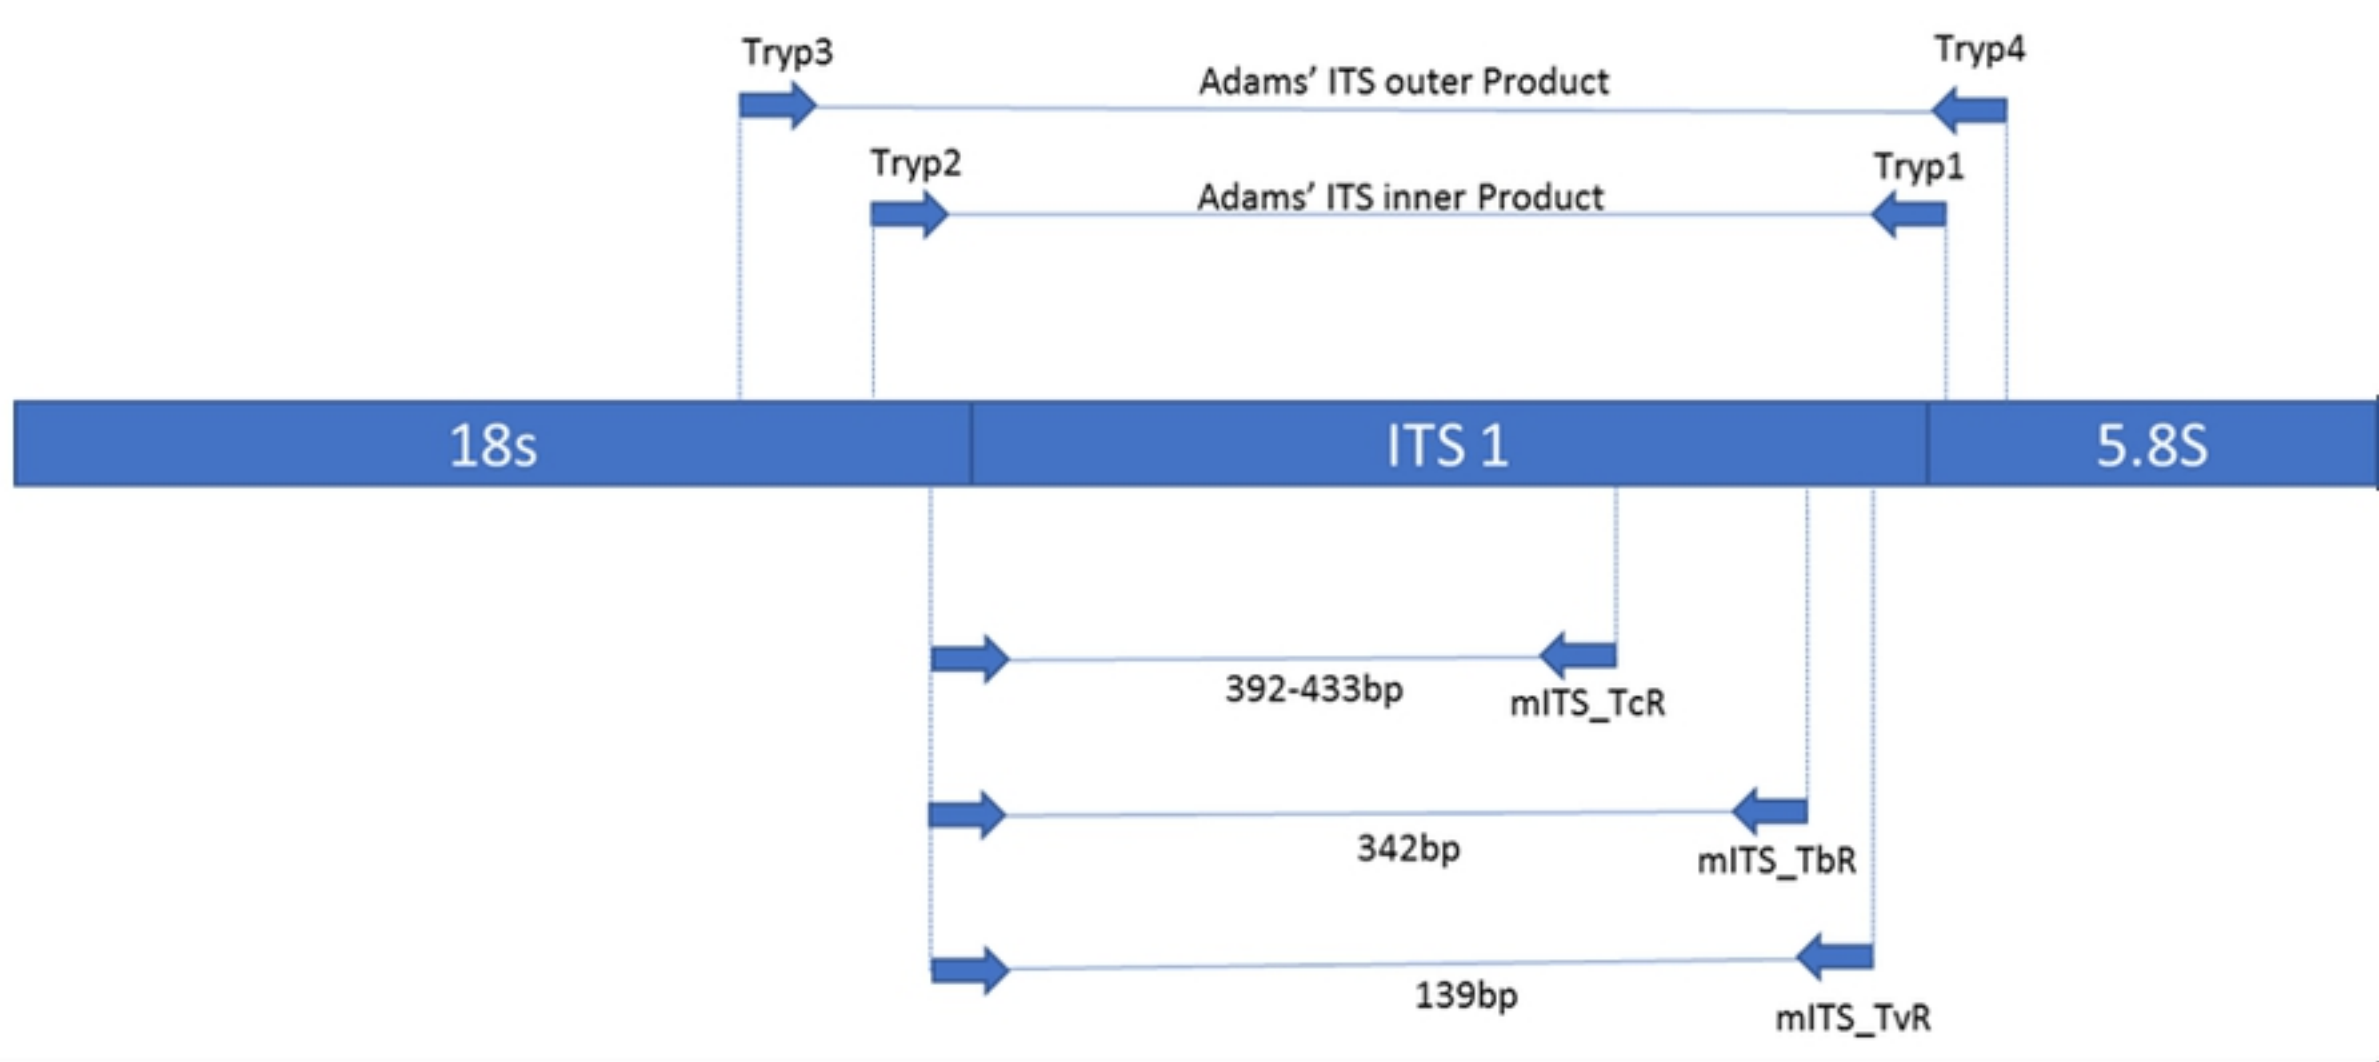

Figure



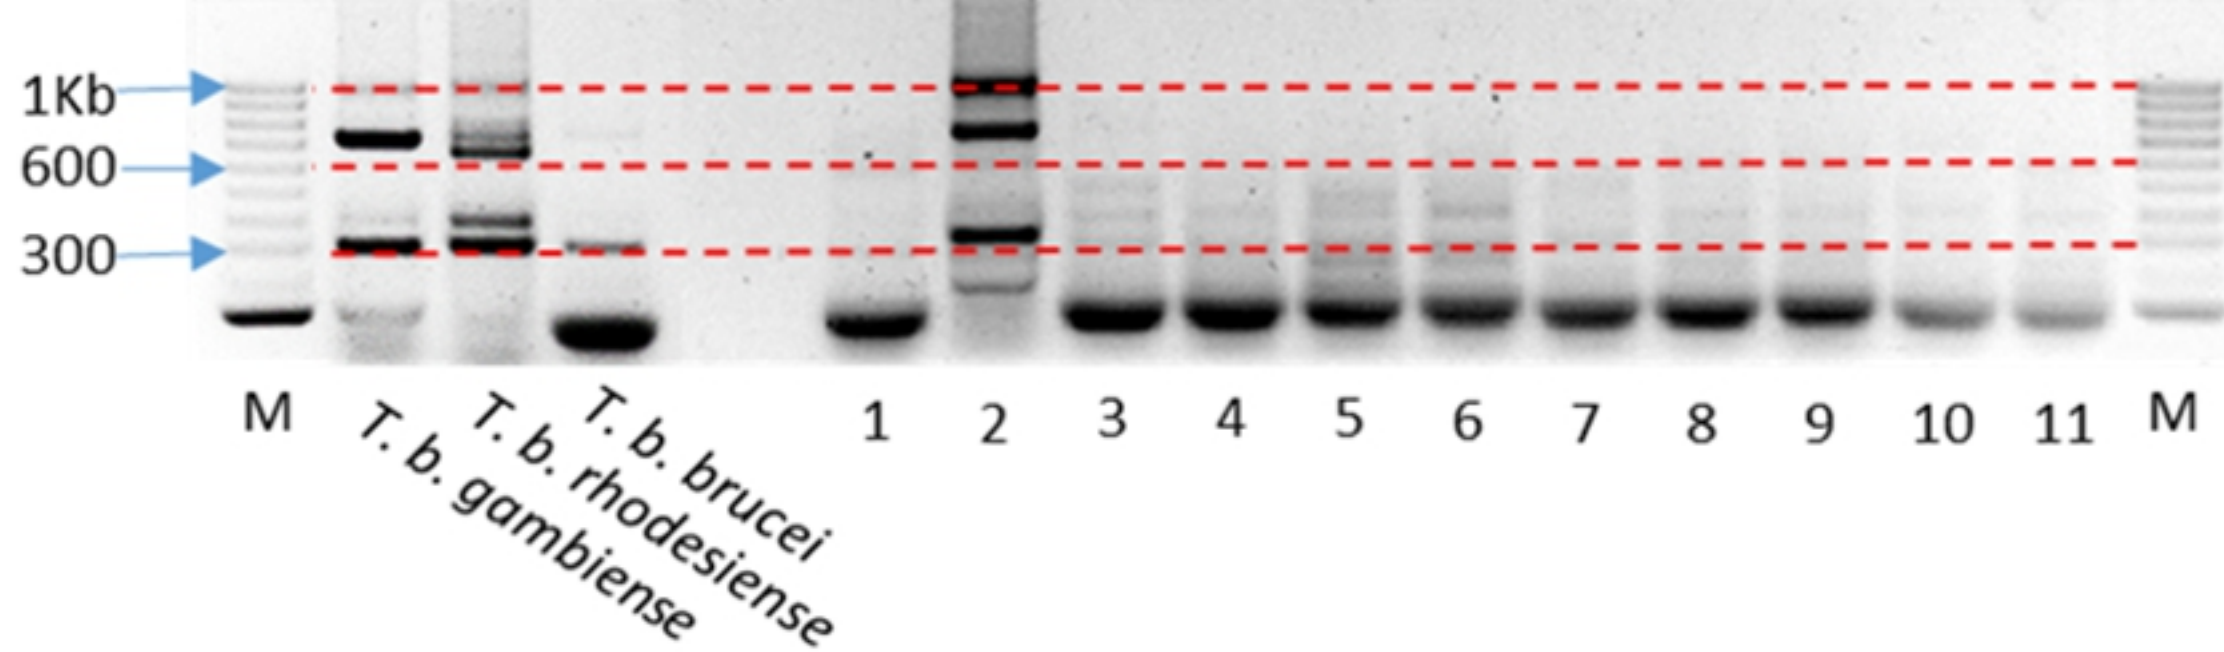

Figure
